# Supplementary material for: In situ preparation of SnO2@polyaniline nanocomposites and their synergetic structure for high-performance supercapacitors
Source: Royal Society of Chemistry journal article supplement (doi:10.1039/c3ta15266a), 2014-01-01
Supplement: c3ta15266a1.pdf [file c3ta15266a1.pdf]

## Electronic Supplementary Information (ESI)

### **In-situ preparation of SnO<sub>2</sub>@polyaniline nanocomposite and the synergetic structure for high-performance supercapacitors**

Lu Wang,<sup>a,c</sup> Lin Chen,<sup>a,c</sup> Bo Yan,<sup>a,c</sup> Chunguang Wang,<sup>a</sup> Feng Zhu,<sup>a</sup> Xuefan Jiang,<sup>a</sup> Yimin Chao<sup>b</sup> and Gang Yang<sup>\*a,b,c</sup>

<sup>a</sup> Jiangsu Laboratory of Advanced Functional Material, Changshu Institute of Technology, Changshu 215500, China.

<sup>b</sup> Energy Materials Laboratory, School of Chemistry, University of East Anglia, Norwich NR4 7TJ, United Kingdom, United Kingdom.

<sup>c</sup> School of Material Science and Engineering, Jiangsu University of Science and Technology, Zhenjiang 212003, China

\* Corresponding Authors. E-mail: gyang@csjg.edu.cn

**Table S1** Summary of electrochemical measurements reported in recent papers for SnO<sub>2</sub>@PANI nanocomposite supercapacitor electrodes.

| Preparation method  | Nature of composite | Content of SnO <sub>2</sub> in composite | Current collector | Electrolyte                       | The Potential window | Current density <sup>a</sup>                                           | Maximum specific capacitance                       | Capacitance retention after cycle test | Ref (year)  |
|---------------------|---------------------|------------------------------------------|-------------------|-----------------------------------|----------------------|------------------------------------------------------------------------|----------------------------------------------------|----------------------------------------|-------------|
| Sol-gel method      | Powder              | -                                        | Graphite sheet    | 1M H <sub>2</sub> SO <sub>4</sub> | -0.2-0.8V            | $i_s = 5 \text{ mA cm}^{-2}$<br><sup>2</sup><br><br>$I = 5 \text{ mA}$ | 305 F g <sup>-1</sup>                              | 95.5% after 500 cycles                 | [14] (2009) |
| Wet chemical method | Powder              | 29.1%                                    | Pt foil           | 1M HClO <sub>4</sub>              | 0- 0.75V             | $i_s = 1 \text{ mA cm}^{-2}$                                           | 219 F g <sup>-1</sup>                              | 72.1% after 100 cycles                 | [16] (2012) |
| Wet chemical method | Powder              | -                                        | Carbon paper      | 1M H <sub>2</sub> SO <sub>4</sub> | -0.2-0.7V            | $i_m = 1 \text{ A g}^{-1}$                                             | 542 F g <sup>-1</sup>                              | -                                      | [7] (2012)  |
| Ultrasonication     | Powder              | 81.3%                                    | Graphite sheet    | 1M H <sub>2</sub> SO <sub>4</sub> | 0-1V                 | $i_m = 0.1 \text{ A g}^{-1}$<br><br>$i_m = 15 \text{ A g}^{-1}$        | 335 F g <sup>-1</sup><br><br>125 F g <sup>-1</sup> | 100% after 10000 cycles                | This work   |

<sup>a</sup>  $i$  = current density,  $i_s$  (mA cm<sup>-2</sup>),  $i_m$  (A g<sup>-1</sup>),  $I$  = Current value.

The transformation from  $i_s$  (mA cm<sup>-2</sup>) to  $i_m$  (A g<sup>-1</sup>):  $i_s = 1000 \times m \times i_m / S$ ,  $m$  (mg) and  $S$  (cm<sup>2</sup>) are the weight and the area of the active electrode, respectively.

In this work,  $m = 1.04 \text{ mg}$ ,  $S = 1 \times 2 \text{ cm}^2$ , and  $0.1 \text{ A g}^{-1} = 52 \text{ mA cm}^{-2}$ .

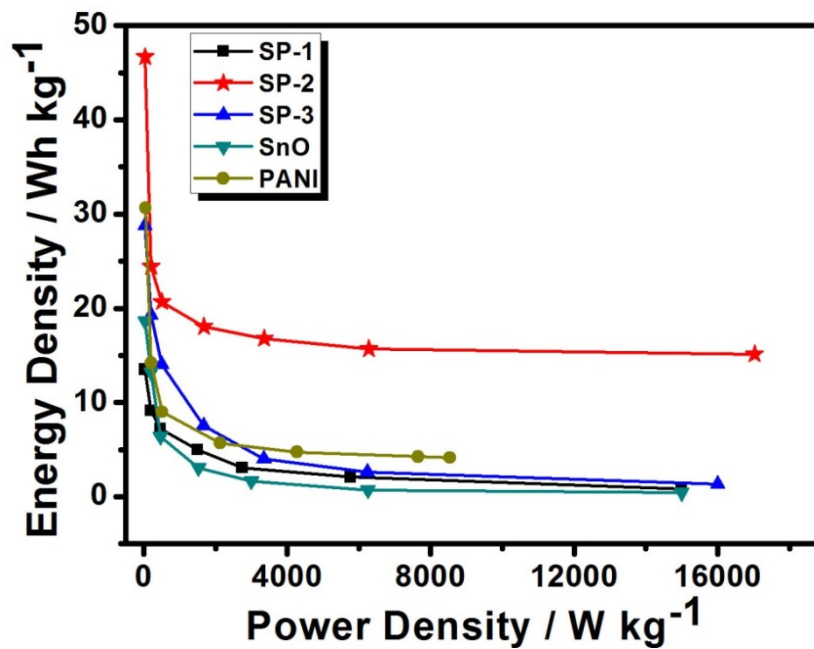

**Fig. S1** Ragone plots of SP-1, SP-2, SP-3, SnO and PANI. The energy density and the power density are derived from the charge/discharge curves at various current densities from 0.1 A g<sup>-1</sup> to 40 A g<sup>-1</sup>.
